# Supplementary material for: Development of Antioxidant and Stable Conjugated Linoleic Acid Pickering Emulsion with Protein Nanofibers by Microwave-Assisted Self-Assembly
Source: MDPI journal article supplement (doi:10.3390/foods10081892), 2021-08-15
Supplement: s1 [file s1]

**Table S1.** Amino acid sequence of possible building blocks of WPNFs identified by LC-MS/MS.

| Amino Acid Sequence                   | Molecular Weight (Da) |           | Source      | Score |
|---------------------------------------|-----------------------|-----------|-------------|-------|
|                                       | Measured Values       | Deviation |             |       |
| -.LIVTQTM*KGLD.I                      | 1234.67116            | -0.00067  | $\beta$ -lg | 23.68 |
| -.LIVTQTM*KGLDIQK.V                   | 1603.90875            | -0.00271  | $\beta$ -lg | 48.44 |
| -.LIVTQTM*KGLDIQKVAGTWYSLAMAASD.I     | 3027.55295            | 0.00127   | $\beta$ -lg | 34.04 |
| -.LIVTQTMK.G                          | 933.54376             | 0.00228   | $\beta$ -lg | 43.8  |
| -.LIVTQTMKG.L                         | 990.56523             | -0.00122  | $\beta$ -lg | 42.09 |
| -.LIVTQTMKGL.D                        | 1103.64929            | 0.00231   | $\beta$ -lg | 32.7  |
| -.LIVTQTMKGLD.I                       | 1218.67624            | 0.00491   | $\beta$ -lg | 36.5  |
| -.LIVTQTMKGLDIQ.K                     | 1459.81888            | 0.00099   | $\beta$ -lg | 44.85 |
| -.LIVTQTMKGLDIQK.V                    | 1587.91383            | 0.01431   | $\beta$ -lg | 30.63 |
| -.LIVTQTMKGLDIQKVAG.T                 | 1815.04083            | 0.00177   | $\beta$ -lg | 23.21 |
| -.LIVTQTMKGLDIQKVAGTWYSLAMAASD.I      | 3027.55295            | 0.00394   | $\beta$ -lg | 48.25 |
| -.LIVTQTMKGLDIQKVAGTWYSLAMAAS.D       | 2896.53108            | -0.00379  | $\beta$ -lg | 29.61 |
| -.LIVTQTMKGLDIQKVAGTWYSLAMAASD.I      | 3011.55803            | 0.00706   | $\beta$ -lg | 54.69 |
| -.LIVTQTMKGLDIQKVAGTWYSLAMAASDISLLD.A | 3552.86918            | 0.00347   | $\beta$ -lg | 22.9  |
| A.LKALPMHIR.L                         | 1078.65535            | 0.0009    | $\beta$ -lg | 42.49 |
| A.LNENKVLVLD.T                        | 1156.65719            | 0.00227   | $\beta$ -lg | 30.6  |
| A.LPMHIR.L.S                          | 879.52328             | 0.0014    | $\beta$ -lg | 28.75 |
| A.MAASDISLLD.A                        | 1035.50267            | -0.0016   | $\beta$ -lg | 22.04 |
| A.PLRVYVEELKPTPEG.D                   | 1726.93739            | 0.00934   | $\beta$ -lg | 28.6  |
| A.PLRVYVEELKPTPEGD.L                  | 1841.96434            | -0.00003  | $\beta$ -lg | 25.18 |
| A.QSAPLRVYVEELKPTPEGD.L               | 2128.09205            | -0.00139  | $\beta$ -lg | 28.28 |
| C.LVRTPEVDD.E                         | 1043.53677            | -0.00147  | $\beta$ -lg | 29.38 |
| C.LVRTPEVDDEALEKFD.K                  | 1875.93344            | -0.00521  | $\beta$ -lg | 26.84 |
| D.ALNENKVLVL.D                        | 1112.66736            | 0.00427   | $\beta$ -lg | 22.7  |
| D.ALNENKVLVLD.T                       | 1227.6943             | 0.00436   | $\beta$ -lg | 29.57 |
| D.ALNENKVLVLDT.D                      | 1328.74199            | 0.01669   | $\beta$ -lg | 38.56 |
| D.ALNENKVLVLDTD.Y                     | 1443.76893            | -0.00153  | $\beta$ -lg | 36.2  |
| D.ALNENKVLVLDTDYK.K                   | 1734.92721            | 0.01131   | $\beta$ -lg | 35.08 |
| D.ALNENKVLVLDTDYKK.Y                  | 1863.02217            | 0.00044   | $\beta$ -lg | 39.05 |
| D.ALNENKVLVLDTDYKKY.L                 | 2026.08549            | 0.00581   | $\beta$ -lg | 44.98 |
| D.AQSAPLRVY.V                         | 1004.55234            | 0.00315   | $\beta$ -lg | 24.22 |
| D.AQSAPLRVYV.E                        | 1103.62076            | 0.00263   | $\beta$ -lg | 25.48 |
| D.AQSAPLRVYVE.E                       | 1232.66334            | 0.00022   | $\beta$ -lg | 42.37 |
| D.AQSAPLRVYVEEL.K                     | 1474.78999            | -0.00093  | $\beta$ -lg | 25.91 |
| D.AQSAPLRVYVEELK.P                    | 1602.88495            | -0.00022  | $\beta$ -lg | 39.1  |
| D.AQSAPLRVYVEELKPT.P                  | 1800.9854             | 0.00187   | $\beta$ -lg | 27.14 |
| D.AQSAPLRVYVEELKPTPE.G                | 2027.08075            | -0.01138  | $\beta$ -lg | 23.55 |
| D.AQSAPLRVYVEELKPTPEG.D               | 2084.10222            | -0.00163  | $\beta$ -lg | 33.3  |
| D.AQSAPLRVYVEELKPTPEGD.L              | 2199.12916            | -0.00315  | $\beta$ -lg | 31.1  |
| D.AQSAPLRVYVEELKPTPEGDL.E             | 2312.21322            | -0.00915  | $\beta$ -lg | 26.74 |
| D.DEALEKFD.K                          | 966.44145             | -0.00019  | $\beta$ -lg | 21.27 |
| D.DEALEKFDK.A                         | 1094.53641            | -0.00032  | $\beta$ -lg | 21.79 |
| D.DEALEKFDK.A.L                       | 1165.57351            | 0.00259   | $\beta$ -lg | 22.04 |
| D.DEALEKFDKALK.A                      | 1406.75253            | 0.00023   | $\beta$ -lg | 35.89 |
| D.DEALEKFDKALK.A.L                    | 1477.78964            | 0.0031    | $\beta$ -lg | 33.36 |
| D.DEALEKFDKALKAL.P                    | 1590.8737             | -0.00276  | $\beta$ -lg | 21.36 |
| D.DEALEKFDKALKALPM*HIRLSFNPT.Q        | 2900.53383            | 0.04238   | $\beta$ -lg | 28.26 |

|                             |            |          |              |       |
|-----------------------------|------------|----------|--------------|-------|
| D.DEALEKFDKALKALPMH.I       | 1956.02586 | -0.00433 | $\beta$ -lg  | 43.56 |
| D.DEALEKFDKALKALPMHIR.L     | 2225.21103 | -0.00715 | $\beta$ -lg  | 58.27 |
| D.DEALEKFDKALKALPMHIRLS.S   | 2338.29509 | -0.00644 | $\beta$ -lg  | 34.57 |
| D.DEALEKFDKALKALPMHIRLS.F   | 2425.32712 | -0.00254 | $\beta$ -lg  | 47.35 |
| D.EALEKFDKAL.K              | 1163.63063 | 0.00314  | $\beta$ -lg  | 31.4  |
| D.EALEKFDKALK.A             | 1291.72558 | -0.00098 | $\beta$ -lg  | 27.63 |
| D.EALEKFDKALKALPMH.I        | 1840.99891 | 0.00271  | $\beta$ -lg  | 27.36 |
| D.EALEKFDKALKALPMHIR.L      | 2110.18408 | 0.00313  | $\beta$ -lg  | 31.9  |
| D.EALEKFDKALKALPMHIRLS.S    | 2223.26814 | 0.00089  | $\beta$ -lg  | 64.84 |
| D.IQKVAGTWYSLAMAASD.I       | 1811.89963 | 0.0023   | $\beta$ -lg  | 23.69 |
| D.IQKVAGTWYSLAMAASDISLLD.A  | 2353.21078 | 0.00268  | $\beta$ -lg  | 35.06 |
| D.ISLLDAQ.S                 | 759.42468  | 0.00248  | $\beta$ -lg  | 20.05 |
| D.ISLLDAQSAPLR.V            | 1283.73175 | 0.00022  | $\beta$ -lg  | 80.21 |
| D.ISLLDAQSAPLRVY.V          | 1545.86349 | 0.00337  | $\beta$ -lg  | 87.02 |
| D.ISLLDAQSAPLRVYVE.E        | 1773.9745  | -0.00222 | $\beta$ -lg  | 30.69 |
| D.KALKALPMH.I               | 1008.60225 | 0.00042  | $\beta$ -lg  | 57.07 |
| D.KALKALPMHIR.L             | 1277.78741 | -0.00092 | $\beta$ -lg  | 53.1  |
| D.KALKALPMHIRLS.S           | 1390.87147 | -0.00152 | $\beta$ -lg  | 44.33 |
| D.LEILLQK.W                 | 856.5502   | 0.00187  | $\beta$ -lg  | 20.03 |
| F.KIDALNENKVLVLD.T          | 1583.90027 | -0.00188 | $\beta$ -lg  | 25.78 |
| K.ALKALPMHIR.L              | 1149.69246 | 0.00041  | $\beta$ -lg  | 38.41 |
| K.ALPMHIR.L                 | 837.47633  | -0.00085 | $\beta$ -lg  | 22.83 |
| K.IIAEKTIPAVFKID.A          | 1686.01999 | -0.00294 | $\beta$ -lg  | 21.66 |
| K.IPAVFKID.A                | 902.53457  | 0.00027  | $\beta$ -lg  | 23.61 |
| K.KIIAEKTIPAVFKID.A         | 1814.11494 | 0.00071  | $\beta$ -lg  | 25.44 |
| L.DAQSAPLRVYVEELKPTPEGD.L   | 2314.15611 | -0.00178 | $\beta$ -lg  | 28.13 |
| L.IVTQTMK.G                 | 820.4597   | 0.00057  | $\beta$ -lg  | 41.23 |
| L.IVTQTMKG.L                | 877.48117  | 0.00044  | $\beta$ -lg  | 27.12 |
| L.KALPMHIR.L                | 965.57129  | -0.00008 | $\beta$ -lg  | 41.58 |
| L.RVYVEELKPTPEGD.L          | 1631.82751 | -0.00261 | $\beta$ -lg  | 26.34 |
| N.KVLVLDTD.Y                | 902.51933  | 0.00031  | $\beta$ -lg  | 28.18 |
| Q.KKIIAEKTIPAVFKID.A        | 1942.2099  | 0.0002   | $\beta$ -lg  | 20.52 |
| Q.SAPLRVYVEELKPTPEGD.L      | 2000.03348 | 0.00043  | $\beta$ -lg  | 20.73 |
| Q.TMKGLDIQKVAGTWYSLAMAASD.I | 2457.21522 | 0.00086  | $\beta$ -lg  | 21.55 |
| R.LSFNPTQLEEQCHI.-          | 1715.80574 | -0.00611 | $\beta$ -lg  | 53.67 |
| R.TPEVDDEALEK.F             | 1245.58449 | 0.00244  | $\beta$ -lg  | 33.89 |
| R.VYVEELKPTPEGD.L           | 1475.72641 | 0.00168  | $\beta$ -lg  | 62.44 |
| S.APLRVYVEELKPTPEGD.L       | 1913.00145 | -0.0031  | $\beta$ -lg  | 40.68 |
| D.KFLDDD.L                  | 752.34611  | 0.00031  | $\alpha$ -la | 27.97 |
| D.KFLDDD.LTD.D              | 1081.5048  | 0.00034  | $\alpha$ -la | 33.02 |
| D.KFLDDD.LTDD.I             | 1196.53175 | -0.00045 | $\alpha$ -la | 31.7  |
| D.TQAIVQ.N                  | 659.37227  | 0.00117  | $\alpha$ -la | 30.57 |

“-” refers the end of the protein and there are no any other amino acids. “.” refers to the restriction site of Trypsin. Mass spectrometry only detects the peptide sequence between these two points. The amino acids on both sides are next to the peptide that matches the database. Amino acid “\*” refers to amino acids that may be modified.
